# Supplementary material for: Screening and HPLC-Based Activity Profiling for New Antiprotozoal Leads from European Plants
Source: Sci Pharm. 2011 Dec 23;80(1):205–13. doi: 10.3797/scipharm.1111-13 (PMC3293357; doi:10.3797/scipharm.1111-13)
Supplement: Supplementary file 1 [file Scipharm-2012-80-205_supporting_information.pdf]

## Supporting Information to

### Screening and HPLC-Based Activity Profiling for New Antiprotozoal Leads from European Plants

**Stefanie ZIMMERMANN, Semira THOMI, Marcel KAISER,  
Matthias HAMBURGER, Michael ADAMS**

Published in Sci Pharm. 2012; 80: 205–213

doi:10.3797/scipharm.1111-13

Available from: <http://dx.doi.org/10.3797/scipharm.1111-13>

© Zimmermann *et al.*; licensee Österreichische Apotheker-Verlagsgesellschaft m. b. H., Vienna, Austria.

This is an Open Access article distributed under the terms of the Creative Commons Attribution License (<http://creativecommons.org/licenses/by/3.0/>), which permits unrestricted use, distribution, and reproduction in any medium, provided the original work is properly cited.

## Table of Contents

**Tab. S1.** Antiplasmodial activity (growth inhibition in %  $\pm$  standard deviation [SD]) of 254 plant extracts against *Plasmodium falciparum*. Bioassays were carried out in duplicate of three independent experiments, at test concentrations of 4.81  $\mu\text{g/mL}$  and 0.81  $\mu\text{g/mL}$ , respectively. The positive control was artesunate (100% inhibition in all bioassays).

## Analytical Methods

**Tab. S1.** Antiplasmodial activity (growth inhibition in %  $\pm$  standard deviation [SD]) of 254 plant extracts against *Plasmodium falciparum*. Bioassays were carried out in duplicate of three independent experiments, at test concentrations of 4.81  $\mu\text{g/mL}$  and 0.81  $\mu\text{g/mL}$ , respectively. The positive control was artesunate (100% inhibition in all bioassays).

| Plant Family | Plant species                                                                   | Historical source    | Src. | Voucher specimen | Plant part | extract solvent | growth inhib. at 4.81 $\mu\text{g/mL}$ $\pm$ SD <sup>a</sup> | growth inhib. at 0.81 $\mu\text{g/mL}$ $\pm$ SD <sup>a</sup> |
|--------------|---------------------------------------------------------------------------------|----------------------|------|------------------|------------|-----------------|--------------------------------------------------------------|--------------------------------------------------------------|
| Adoxaceae    | <i>Sambucus ebulus</i> L.                                                       | Br., Lo., Ta.2       | A    | P01663           | leaves     | PE              | 12.3 $\pm$ 6.9                                               | 1.9 $\pm$ 1.4                                                |
|              |                                                                                 |                      |      | P01664           | leaves     | EtOAc           | 9.1 $\pm$ 12.2                                               | 1.5 $\pm$ 2.1                                                |
|              |                                                                                 |                      |      | P01665           | leaves     | MeOH            | 3.3 $\pm$ 4.7                                                | 1.3 $\pm$ 1.8                                                |
|              |                                                                                 |                      |      | P01669           | fruits     | PE              | 20.5 $\pm$ 15.0                                              | 0.2 $\pm$ 0.2                                                |
|              |                                                                                 |                      |      | P01670           | fruits     | EtOAc           | 15.8 $\pm$ 15.2                                              | 8.8 $\pm$ 11.8                                               |
|              |                                                                                 |                      |      | P01671           | fruits     | MeOH            | 15.9 $\pm$ 20.3                                              | 2.7 $\pm$ 3.8                                                |
|              |                                                                                 |                      |      | P01547           | roots      | PE              | 58.0 $\pm$ 10.3                                              | 6.8 $\pm$ 5.2                                                |
|              | <i>Sambucus nigra</i> L.                                                        | Lo., Ta.2            | A    | P01548           | roots      | EtOAc           | 9.4 $\pm$ 5.1                                                | 5.4 $\pm$ 5.2                                                |
|              |                                                                                 |                      |      | P01549           | roots      | MeOH            | 29.0 $\pm$ 9.0                                               | 9.7 $\pm$ 7.5                                                |
|              |                                                                                 |                      |      | P01681           | flowers    | PE              | 7.8 $\pm$ 6.6                                                | 2.2 $\pm$ 1.9                                                |
|              |                                                                                 |                      |      | P01682           | flowers    | EtOAc           | 7.5 $\pm$ 5.8                                                | 0.0 $\pm$ 0.0                                                |
|              |                                                                                 |                      |      | P01683           | flowers    | MeOH            | 9.9 $\pm$ 7.1                                                | 6.5 $\pm$ 4.8                                                |
|              | Amaryllidaceae <i>Allium ursinum</i> L.                                         | –                    | A    | P01592           | aer. pts.  | PE              | 7.9 $\pm$ 7.6                                                | 0.0 $\pm$ 0.0                                                |
|              |                                                                                 |                      |      | P01593           | aer. pts.  | EtOAc           | 5.5 $\pm$ 4.0                                                | 0.6 $\pm$ 0.9                                                |
|              |                                                                                 |                      |      | P01594           | aer. pts.  | MeOH            | 13.4 $\pm$ 5.9                                               | 1.1 $\pm$ 2.0                                                |
| Apiaceae     | <i>Angelica archangelica</i> L.                                                 | Ta.2                 | A    | P01610           | fruits     | PE              | 16.0 $\pm$ 9.6                                               | 10.9 $\pm$ 5.7                                               |
|              |                                                                                 |                      |      | P01611           | fruits     | EtOAc           | 15.6 $\pm$ 11.7                                              | 14.5 $\pm$ 20.5                                              |
|              |                                                                                 |                      |      | P01612           | gruits     | MeOH            | 17.2 $\pm$ 8.2                                               | 8.6 $\pm$ 7.4                                                |
|              |                                                                                 |                      |      | P01613           | fer. pts.  | PE              | 32.9 $\pm$ 20.2                                              | 28.4 $\pm$ 24.2                                              |
|              |                                                                                 |                      |      | P01614           | aer. pts.  | EtOAc           | 35.0 $\pm$ 8.7                                               | 8.4 $\pm$ 6.8                                                |
|              |                                                                                 |                      |      | P01615           | aer. pts.  | MeOH            | 9.9 $\pm$ 7.1                                                | 7.7 $\pm$ 5.5                                                |
|              |                                                                                 |                      |      | P01616           | roots      | PE              | 36.6 $\pm$ 16.0                                              | 29.1 $\pm$ 41.1                                              |
|              |                                                                                 |                      |      | P01617           | roots      | EtOAc           | 41.6 $\pm$ 3.5                                               | 19.4 $\pm$ 6.1                                               |
|              |                                                                                 |                      |      | P01618           | roots      | MeOH            | 17.6 $\pm$ 1.8                                               | 12.7 $\pm$ 9.0                                               |
|              | <i>Angelica sylvestris</i> L.                                                   | Ta.2                 | B    | SZ0001           | fruits     | PE              | 34.0 $\pm$ 5.0                                               | 5.2 $\pm$ 3.8                                                |
|              |                                                                                 |                      |      | SZ0002           | fruits     | EtOAc           | 51.0 $\pm$ 6.6                                               | 1.7 $\pm$ 2.5                                                |
|              |                                                                                 |                      |      | SZ0003           | fruits     | MeOH            | 4.9 $\pm$ 5.4                                                | 1.5 $\pm$ 1.1                                                |
|              |                                                                                 |                      |      | SZ0004           | leaves     | PE              | 6.7 $\pm$ 0.7                                                | 0.0 $\pm$ 0.0                                                |
|              |                                                                                 |                      |      | SZ0005           | leaves     | EtOAc           | 54.6 $\pm$ 3.0                                               | 4.4 $\pm$ 3.5                                                |
|              |                                                                                 |                      |      | SZ0006           | leaves     | MeOH            | 17.5 $\pm$ 23.1                                              | 5.0 $\pm$ 3.9                                                |
|              |                                                                                 |                      |      | SZ0007           | roots      | PE              | 35.6 $\pm$ 2.3                                               | 10.2 $\pm$ 2.6                                               |
|              |                                                                                 |                      |      | SZ0008           | roots      | EtOAc           | 52.3 $\pm$ 1.3                                               | 8.6 $\pm$ 6.1                                                |
|              |                                                                                 |                      |      | SZ0009           | roots      | MeOH            | 16.5 $\pm$ 2.5                                               | 2.3 $\pm$ 2.1                                                |
|              | <i>Coriandrum sativum</i> L.                                                    | Br., Ta.2            | A    | P01678           | seed       | PE              | 6.3 $\pm$ 9.0                                                | 2.9 $\pm$ 4.1                                                |
|              |                                                                                 |                      |      | P01679           | seed       | EtOAc           | 3.3 $\pm$ 1.0                                                | 7.8 $\pm$ 11.1                                               |
|              |                                                                                 |                      |      | P01680           | seed       | MeOH            | 6.9 $\pm$ 6.7                                                | 0.0 $\pm$ 0.0                                                |
|              | <i>Eryngium campestre</i> L.                                                    | Ma., Ta.1, Ta.2, Zw. | A    | P01559           | roots      | PE              | 36.9 $\pm$ 11.7                                              | 4.8 $\pm$ 1.9                                                |
|              |                                                                                 |                      |      | P01560           | roots      | EtOAc           | 44.5 $\pm$ 6.5                                               | 0.0 $\pm$ 0.0                                                |
|              |                                                                                 |                      |      | P01561           | roots      | MeOH            | 13.6 $\pm$ 3.2                                               | 9.9 $\pm$ 5.5                                                |
|              |                                                                                 |                      |      | P01565           | aer. pts.  | PE              | 64.1 $\pm$ 2.3                                               | 1.6 $\pm$ 4.0                                                |
|              |                                                                                 |                      |      | P01566           | aer. pts.  | EtOAc           | 16.9 $\pm$ 5.5                                               | 0.1 $\pm$ 4.4                                                |
|              |                                                                                 |                      |      | P01567           | aer. pts.  | MeOH            | 34.4 $\pm$ 3.8                                               | 0.0 $\pm$ 0.0                                                |
|              |                                                                                 |                      |      | P01577           | aer. pts.  | PE              | 29.7 $\pm$ 2.2                                               | 2.5 $\pm$ 1.8                                                |
| Apiaceae     | <i>Foeniculum vulgare</i> Mill. subsp. <i>vulgare</i> var. <i>dulce</i> (Mill.) | Ta.2                 | A    | P01578           | aer. pts.  | EtOAc           | 8.7 $\pm$ 3.5                                                | 0.0 $\pm$ 0.0                                                |
|              |                                                                                 |                      |      | P01579           | aer. pts.  | MeOH            | 5.1 $\pm$ 2.5                                                | 1.5 $\pm$ 2.1                                                |
|              |                                                                                 |                      |      | P01587           | rhizome    | PE              | 11.7 $\pm$ 8.0                                               | 0.0 $\pm$ 0.0                                                |
|              | <i>Peucedanum ostruthium</i> (L.) Koch                                          | Bo., Br., Ma., Zw.   | A    | P01588           | rhizome    | EtOAc           | 16.4 $\pm$ 4.2                                               | 1.7 $\pm$ 2.4                                                |
|              |                                                                                 |                      |      | P01586           | rhizome    | MeOH            | 15.4 $\pm$ 9.8                                               | 0.0 $\pm$ 0.0                                                |
|              |                                                                                 |                      |      | P01590           | aer. pts.  | PE              | 71.1 $\pm$ 8.1                                               | 0.0 $\pm$ 0.0                                                |
|              |                                                                                 |                      |      | P01591           | aer. pts.  | EtOAc           | 7.8 $\pm$ 6.7                                                | 3.9 $\pm$ 5.5                                                |
|              |                                                                                 |                      |      | P01589           | aer. pts.  | MeOH            | 31.2 $\pm$ 3.2                                               | 1.2 $\pm$ 1.7                                                |
|              | Asparagaceae <i>Asparagus officinalis</i> L.                                    | Ta.2, Zw.            | A    | P01463           | roots      | PE              | 26.4 $\pm$ 10.9                                              | 0.3 $\pm$ 0.3                                                |
|              |                                                                                 |                      |      | P01464           | roots      | EtOAc           | 75.5 $\pm$ 7.5                                               | 4.0 $\pm$ 4.8                                                |
|              |                                                                                 |                      |      | P01465           | roots      | MeOH            | 37.5 $\pm$ 0.8                                               | 1.6 $\pm$ 1.1                                                |
| Aspleniaceae | <i>Asplenium scolopendrium</i> L.                                               | Bo., Lo, Zw.         | B    | P01666           | leaves     | PE              | 4.7 $\pm$ 5.9                                                | 0.0 $\pm$ 0.0                                                |
|              |                                                                                 |                      |      | P01667           | leaves     | EtOAc           | 7.4 $\pm$ 5.3                                                | 0.0 $\pm$ 0.0                                                |
|              |                                                                                 |                      |      | P01668           | leaves     | MeOH            | 11.3 $\pm$ 14.6                                              | 0.0 $\pm$ 0.0                                                |
| Asteraceae   | <i>Achillea millefolium</i> L.                                                  | Ta.2                 | A    | P01599           | aer. pts.  | PE              | 48.4 $\pm$ 4.1                                               | 0.0 $\pm$ 0.0                                                |
|              |                                                                                 |                      |      | P01600           | aer. pts.  | EtOAc           | 9.3 $\pm$ 1.1                                                | 0.0 $\pm$ 0.0                                                |
|              |                                                                                 |                      |      | P01598           | aer. pts.  | MeOH            | 16.6 $\pm$ 7.1                                               | 0.5 $\pm$ 0.3                                                |
|              | <i>Achillea moschata</i> Wulfen                                                 | –                    | A    | P01499           | aer. pts.  | PE              | 42.6 $\pm$ 17.2                                              | 5.9 $\pm$ 5.0                                                |
|              |                                                                                 |                      |      | P01500           | aer. pts.  | EtOAc           | 36.5 $\pm$ 12.6                                              | 0.0 $\pm$ 0.0                                                |
|              |                                                                                 |                      |      | P01501           | aer. pts.  | MeOH            | 8.4 $\pm$ 7.2                                                | 0.0 $\pm$ 0.0                                                |
|              | <i>Anacyclus pyrethrum</i> (L.)                                                 | Bo., Ma., Ta.2, Zw.  | B    | P01637           | roots      | PE              | 15.0 $\pm$ 6.1                                               | 0.4 $\pm$ 0.6                                                |
|              |                                                                                 |                      |      | P01638           | roots      | EtOAc           | 65.3 $\pm$ 2.8                                               | 26.2 $\pm$ 32.0                                              |

Tab. S1. (Cont).

| Plant Family | Plant species                   | Historical source | Src. | Voucher specimen | Plant part  | extract solvent | growth inhib. at 4.81 $\mu\text{g/mL}$ $\pm$ SD <sup>a</sup> |  | growth inhib. at 0.81 $\mu\text{g/mL}$ $\pm$ SD <sup>a</sup> |  |
|--------------|---------------------------------|-------------------|------|------------------|-------------|-----------------|--------------------------------------------------------------|--|--------------------------------------------------------------|--|
| Asteraceae   | <i>Arctium lappa</i> L.         | Zw.               | A    | P01472           | leaves      | PE              | 17.4 $\pm$ 1.5                                               |  | 2.0 $\pm$ 2.9                                                |  |
|              |                                 |                   |      | P01473           | leaves      | EtOAc           | 33.3 $\pm$ 25.7                                              |  | 0.0 $\pm$ 0.0                                                |  |
|              |                                 |                   |      | P01474           | leaves      | MeOH            | 8.9 $\pm$ 8.1                                                |  | 2.3 $\pm$ 3.2                                                |  |
|              |                                 |                   |      | P01475           | roots       | PE              | 50.5 $\pm$ 3.0                                               |  | 54.7 $\pm$ 2.8                                               |  |
|              |                                 |                   |      | P01476           | roots       | EtOAc           | 23.3 $\pm$ 4.0                                               |  | 11.2 $\pm$ 2.0                                               |  |
|              | <i>Arctium nemorosum</i> Lej.   | —                 | B    | P01477           | roots       | MeOH            | 4.1 $\pm$ 3.0                                                |  | 0.3 $\pm$ 0.5                                                |  |
|              |                                 |                   |      | SZ0010           | aer. pts    | MeOH            | 53.6 $\pm$ 24.8                                              |  | 21.8 $\pm$ 29.1                                              |  |
|              |                                 |                   |      | SZ0011           | leaves      | PE              | 16.4 $\pm$ 3.9                                               |  | 12.8 $\pm$ 2.9                                               |  |
|              |                                 |                   |      | SZ0012           | leaves      | EtOAc           | 99.1 $\pm$ 0.4                                               |  | 14.1 $\pm$ 10.0                                              |  |
|              |                                 |                   |      | SZ0013           | leaves      | MeOH            | 16.5 $\pm$ 3.2                                               |  | 4.3 $\pm$ 3.2                                                |  |
|              |                                 |                   |      | SZ0014           | fruits      | PE              | 5.3 $\pm$ 3.8                                                |  | 2.3 $\pm$ 3.3                                                |  |
|              |                                 |                   |      | SZ0015           | fruits      | EtOAc           | 55.6 $\pm$ 4.8                                               |  | 3.1 $\pm$ 4.2                                                |  |
|              |                                 |                   |      | SZ0016           | fruits      | MeOH            | 5.8 $\pm$ 3.5                                                |  | 0.0 $\pm$ 0.0                                                |  |
|              |                                 |                   |      | SZ0017           | hollow stem | PE              | 2.7 $\pm$ 2.0                                                |  | 1.7 $\pm$ 2.4                                                |  |
|              |                                 |                   |      | SZ0018           | hollow stem | EtOAc           | 31.3 $\pm$ 5.6                                               |  | 1.3 $\pm$ 1.8                                                |  |
|              |                                 |                   |      | SZ0019           | hollow stem | MeOH            | 57.5 $\pm$ 3.4                                               |  | 17.5 $\pm$ 3.9                                               |  |
|              |                                 |                   |      | SZ0020           | roots       | PE              | 5.0 $\pm$ 4.9                                                |  | 1.7 $\pm$ 2.1                                                |  |
|              |                                 |                   |      | SZ0021           | roots       | EtOAc           | 31.0 $\pm$ 5.6                                               |  | 0.6 $\pm$ 0.8                                                |  |
|              |                                 |                   |      | SZ0022           | roots       | MeOH            | 3.2 $\pm$ 4.5                                                |  | 0.0 $\pm$ 0.0                                                |  |
|              | <i>Arnica montana</i> L.        | —                 | B    | P01451           | flowers     | PE              | 18.2 $\pm$ 3.8                                               |  | 6.4 $\pm$ 4.7                                                |  |
|              |                                 |                   |      | P01452           | flowers     | EtOAc           | 30.7 $\pm$ 6.8                                               |  | 4.0 $\pm$ 5.7                                                |  |
|              |                                 |                   |      | P01453           | flowers     | MeOH            | 5.7 $\pm$ 4.4                                                |  | 0.0 $\pm$ 0.0                                                |  |
|              |                                 |                   |      | P01454           | roots       | PE              | 23.1 $\pm$ 0.9                                               |  | 14.1 $\pm$ 1.3                                               |  |
|              |                                 |                   |      | P01455           | roots       | EtOAc           | 36.1 $\pm$ 3.2                                               |  | 5.9 $\pm$ 8.3                                                |  |
|              | <i>Artemisia abrotanum</i> L.   | Bo., Ma., Ta.2    | A    | P01456           | roots       | MeOH            | 13.5 $\pm$ 8.0                                               |  | 5.6 $\pm$ 4.0                                                |  |
|              |                                 |                   |      | P01433           | aer. pts.   | PE              | 50.2 $\pm$ 2.4                                               |  | 23.5 $\pm$ 8.5                                               |  |
|              |                                 |                   |      | P01434           | aer. pts.   | EtOAc           | 69.3 $\pm$ 3.4                                               |  | 18.3 $\pm$ 7.9                                               |  |
|              | <i>Artemisia absinthium</i> L.  | Ma., Ta.2, Zw.    | B    | P01435           | aer. pts.   | MeOH            | 17.8 $\pm$ 11.2                                              |  | 8.5 $\pm$ 6.0                                                |  |
|              |                                 |                   |      | P01672           | leaves      | PE              | 67.9 $\pm$ 11.2                                              |  | 5.8 $\pm$ 3.8                                                |  |
|              |                                 |                   |      | P01673           | leaves      | EtOAc           | 55.7 $\pm$ 14.5                                              |  | 3.8 $\pm$ 4.9                                                |  |
|              | <i>Artemisia dracunculus</i> L. | —                 | A    | P01674           | leaves      | MeOH            | 6.3 $\pm$ 7.4                                                |  | 1.0 $\pm$ 1.5                                                |  |
|              |                                 |                   |      | P01545           | aer. pts.   | PE              | 16.5 $\pm$ 3.2                                               |  | 0.5 $\pm$ 0.7                                                |  |
|              |                                 |                   |      | P01546           | aer. pts.   | EtOAc           | 4.3 $\pm$ 3.0                                                |  | 7.1 $\pm$ 5.0                                                |  |
|              |                                 |                   |      | P01544           | aer. pts.   | MeOH            | 24.5 $\pm$ 3.2                                               |  | 1.7 $\pm$ 1.8                                                |  |
| Asteraceae   | <i>Artemisia vulgaris</i> L.    | Ta.2              | A    | P01457           | aer. pts.   | PE              | 18.9 $\pm$ 7.0                                               |  | 6.3 $\pm$ 2.7                                                |  |
|              |                                 |                   |      | P01458           | aer. pts.   | EtOAc           | 41.9 $\pm$ 11.6                                              |  | 0.0 $\pm$ 0.0                                                |  |
|              |                                 |                   |      | P01459           | aer. pts.   | MeOH            | 0.0 $\pm$ 0.0                                                |  | 0.0 $\pm$ 0.0                                                |  |
|              |                                 |                   |      | P01460           | roots       | PE              | 16.5 $\pm$ 5.9                                               |  | 5.2 $\pm$ 4.1                                                |  |
|              |                                 |                   |      | P01461           | roots       | EtOAc           | 44.1 $\pm$ 9.7                                               |  | 5.0 $\pm$ 4.3                                                |  |
|              |                                 |                   | B    | P01462           | roots       | MeOH            | 17.3 $\pm$ 3.8                                               |  | 6.6 $\pm$ 5.7                                                |  |
|              |                                 |                   |      | P01645           | aer. pts.   | PE              | 31.7 $\pm$ 3.4                                               |  | 15.2 $\pm$ 11.4                                              |  |
|              |                                 |                   |      | P01646           | aer. pts.   | EtOAc           | 19.4 $\pm$ 10.7                                              |  | 0.4 $\pm$ 0.7                                                |  |
|              |                                 |                   |      | P01647           | aer. pts.   | MeOH            | 6.0 $\pm$ 1.9                                                |  | 0.0 $\pm$ 0.0                                                |  |
|              |                                 |                   |      | P01648           | aer. pts.   | PE              | 9.1 $\pm$ 9.6                                                |  | 1.2 $\pm$ 1.7                                                |  |
|              | <i>Carthamus tinctorius</i> L.  | —                 | A    | P01502           | flowers     | PE              | 10.3 $\pm$ 2.1                                               |  | 0.4 $\pm$ 0.6                                                |  |
|              |                                 |                   |      | P01503           | flowers     | EtOAc           | 9.0 $\pm$ 6.7                                                |  | 1.0 $\pm$ 1.5                                                |  |
|              |                                 |                   |      | P01504           | flowers     | MeOH            | 54.8 $\pm$ 9.1                                               |  | 22.3 $\pm$ 3.5                                               |  |
|              | <i>Centaurea cyanus</i> L.      | Bo., Lo.          | A    | P01528           | flowers     | EtOAc           | 19.2 $\pm$ 8.0                                               |  | 9.6 $\pm$ 6.3                                                |  |
|              |                                 |                   |      | P01526           | flowers     | MeOH            | 28.0 $\pm$ 6.6                                               |  | 26.4 $\pm$ 7.5                                               |  |
|              |                                 |                   |      | P01648           | flowers     | PE              | 40.7 $\pm$ 5.8                                               |  | 0.0 $\pm$ 0.0                                                |  |
|              | <i>Centaurea montana</i> L.     | —                 | B    | P01649           | flowers     | EtOAc           | 16.6 $\pm$ 5.3                                               |  | 18.2 $\pm$ 25.7                                              |  |
|              |                                 |                   |      | P01650           | flowers     | MeOH            | 16.5 $\pm$ 2.6                                               |  | 0.0 $\pm$ 0.1                                                |  |
|              |                                 |                   |      | P01651           | leaves      | PE              | 25.3 $\pm$ 8.7                                               |  | 6.5 $\pm$ 3.8                                                |  |
|              |                                 |                   |      | P01652           | leaves      | EtOAc           | 10.0 $\pm$ 4.6                                               |  | 0.0 $\pm$ 0.0                                                |  |
|              |                                 |                   |      | P01653           | leaves      | MeOH            | 8.4 $\pm$ 2.7                                                |  | 1.1 $\pm$ 1.1                                                |  |
|              |                                 |                   |      | P01514           | roots       | PE              | 6.0 $\pm$ 4.4                                                |  | 0.0 $\pm$ 0.0                                                |  |
|              | <i>Cichorium intybus</i> L.     | Bo., Ta.2, Zw.    | A    | P01515           | roots       | EtOAc           | 14.2 $\pm$ 1.9                                               |  | 2.0 $\pm$ 1.4                                                |  |
|              |                                 |                   |      | P01516           | roots       | MeOH            | 1.8 $\pm$ 2.3                                                |  | 0.0 $\pm$ 0.0                                                |  |
|              |                                 |                   |      | P01517           | aer. pts.   | PE              | 9.5 $\pm$ 1.9                                                |  | 0.0 $\pm$ 0.0                                                |  |
|              |                                 |                   |      | P01518           | aer. pts.   | EtOAc           | 18.2 $\pm$ 11.4                                              |  | 0.1 $\pm$ 0.2                                                |  |
|              |                                 |                   |      | P01519           | aer. pts.   | MeOH            | 6.5 $\pm$ 6.6                                                |  | 0.0 $\pm$ 0.0                                                |  |
|              |                                 |                   |      | P01657           | aer. pts.   | PE              | 9.7 $\pm$ 8.6                                                |  | 0.0 $\pm$ 0.0                                                |  |
|              |                                 |                   | B    | P01658           | aer. pts.   | EtOAc           | 9.7 $\pm$ 13.7                                               |  | 0.0 $\pm$ 0.0                                                |  |
|              |                                 |                   |      | P01659           | aer. pts.   | MeOH            | 3.5 $\pm$ 3.3                                                |  | 0.6 $\pm$ 0.8                                                |  |
|              |                                 |                   |      | P01660           | roots       | PE              | 15.0 $\pm$ 12.3                                              |  | 4.5 $\pm$ 6.3                                                |  |
|              |                                 |                   |      | P01661           | roots       | EtOAc           | 21.0 $\pm$ 3.1                                               |  | 1.1 $\pm$ 1.0                                                |  |
|              |                                 |                   |      | P01662           | roots       | MeOH            | 12.1 $\pm$ 3.6                                               |  | 3.9 $\pm$ 3.7                                                |  |

Tab. S1. (Cont).

| Plant Family    | Plant species                                            | Historical source        | Src. | Voucher specimen | Plant part       | extract solvent | growth inhib. at 4.81 $\mu\text{g/mL}$ $\pm$ SD <sup>a</sup> | growth inhib. at 0.81 $\mu\text{g/mL}$ $\pm$ SD <sup>a</sup> |
|-----------------|----------------------------------------------------------|--------------------------|------|------------------|------------------|-----------------|--------------------------------------------------------------|--------------------------------------------------------------|
| Asteraceae      | <i>Echinacea angustifolia</i> DC.                        | –                        | A    | P01551           | roots            | PE              | 20.6 $\pm$ 6.9                                               | 4.2 $\pm$ 4.0                                                |
|                 |                                                          |                          |      | P01552           | roots            | EtOAc           | 8.9 $\pm$ 6.1                                                | 1.3 $\pm$ 1.9                                                |
|                 |                                                          |                          |      | P01550           | roots            | MeOH            | 12.2 $\pm$ 7.8                                               | 3.1 $\pm$ 3.1                                                |
|                 | <i>Echinacea purpurea</i> (L.) Moench                    | –                        | A    | P01554           | roots            | PE              | 29.2 $\pm$ 12.8                                              | 0.0 $\pm$ 0.0                                                |
|                 |                                                          |                          |      | P01555           | roots            | EtOAc           | 19.0 $\pm$ 7.4                                               | 0.3 $\pm$ 0.2                                                |
|                 |                                                          |                          |      | P01553           | roots            | MeOH            | 24.1 $\pm$ 9.0                                               | 0.0 $\pm$ 0.0                                                |
|                 |                                                          |                          |      | P01557           | aer. pts.        | PE              | 23.3 $\pm$ 6.5                                               | 0.0 $\pm$ 0.0                                                |
|                 |                                                          |                          |      | P01558           | aer. pts.        | EtOAc           | 21.9 $\pm$ 2.9                                               | 10.1 $\pm$ 5.2                                               |
|                 |                                                          |                          |      | P01556           | aer. pts.        | MeOH            | 16.2 $\pm$ 0.6                                               | 1.4 $\pm$ 2.0                                                |
|                 | <i>Eupatorium cannabinum</i> L.                          | Ma.                      | A    | P01569           | aer. pts.        | PE              | 38.7 $\pm$ 9.6                                               | 5.2 $\pm$ 4.1                                                |
|                 |                                                          |                          |      | P01570           | aer. pts.        | EtOAc           | 11.2 $\pm$ 9.1                                               | 0.9 $\pm$ 0.6                                                |
|                 |                                                          |                          |      | P01568           | aer. pts.        | MeOH            | 17.4 $\pm$ 4.0                                               | 0.0 $\pm$ 0.0                                                |
|                 |                                                          |                          |      | P01572           | aer. pts.        | PE              | 31.6 $\pm$ 3.2                                               | 5.6 $\pm$ 5.3                                                |
|                 |                                                          |                          |      | P01573           | aer. pts.        | EtOAc           | 8.7 $\pm$ 1.9                                                | 0.0 $\pm$ 0.0                                                |
|                 |                                                          |                          |      | P01571           | aer. pts.        | MeOH            | 16.4 $\pm$ 10.2                                              | 0.0 $\pm$ 0.0                                                |
|                 | <i>Inula conyzae</i> (Griess.) Meikle                    | Bo.                      | B    | SZ0023           | roots            | PE              | 25.9 $\pm$ 5.6                                               | 3.0 $\pm$ 2.2                                                |
|                 |                                                          |                          |      | SZ0024           | roots            | EtOAc           | 66.4 $\pm$ 8.3                                               | 5.4 $\pm$ 6.0                                                |
|                 |                                                          |                          |      | SZ0025           | roots            | MeOH            | 21.2 $\pm$ 15.0                                              | 0.0 $\pm$ 0.0                                                |
|                 |                                                          |                          |      | SZ0026           | leaves + flowers | PE              | 3.3 $\pm$ 3.7                                                | 13.2 $\pm$ 18.5                                              |
|                 |                                                          |                          |      | SZ0027           | leaves + flowers | EtOAc           | 7.5 $\pm$ 3.9                                                | 0.0 $\pm$ 0.0                                                |
|                 |                                                          |                          |      | SZ0028           | leaves + flowers | MeOH            | 2.6 $\pm$ 3.7                                                | 10.3 $\pm$ 14.5                                              |
|                 | <i>Silybum marianum</i> (L.) Gaertn.                     | –                        | A    | P01490           | aer. pts.        | PE              | 11.4 $\pm$ 9.4                                               | 0.0 $\pm$ 0.0                                                |
|                 |                                                          |                          |      | P01491           | aer. pts.        | EtOAc           | 19.8 $\pm$ 7.3                                               | 0.0 $\pm$ 0.0                                                |
|                 |                                                          |                          |      | P01492           | aer. pts.        | MeOH            | 6.8 $\pm$ 7.1                                                | 0.0 $\pm$ 0.0                                                |
|                 |                                                          |                          |      | P01493           | fruits           | PE              | 8.0 $\pm$ 5.1                                                | 11.0 $\pm$ 2.5                                               |
|                 |                                                          |                          |      | P01494           | fruits           | EtOAc           | 24.7 $\pm$ 5.5                                               | 0.0 $\pm$ 0.0                                                |
|                 |                                                          |                          |      | P01495           | fruits           | MeOH            | 23.9 $\pm$ 8.5                                               | 0.5 $\pm$ 0.8                                                |
| Asteraceae      | <i>Tanacetum parthenium</i> L.                           | Br., Lo., Zw.            | A    | P01511           | aer. pts.        | PE              | 21.9 $\pm$ 10.3                                              | 0.0 $\pm$ 0.0                                                |
|                 |                                                          |                          |      | P01512           | aer. pts.        | EtOAc           | 37.6 $\pm$ 11.4                                              | 0.0 $\pm$ 0.0                                                |
|                 |                                                          |                          |      | P01513           | aer. pts.        | MeOH            | 3.6 $\pm$ 5.1                                                | 0.4 $\pm$ 0.5                                                |
| Brassicaceae    | <i>Armoracia rusticana</i> G. Gaertn., B. Mey. & Scherb. | Bo., Lo, Ta.2, Zw.       | A    | P01445           | roots            | PE              | 9.4 $\pm$ 6.8                                                | 0.6 $\pm$ 0.9                                                |
|                 |                                                          |                          |      | P01446           | roots            | EtOAc           | 29.8 $\pm$ 11.4                                              | 9.3 $\pm$ 3.8                                                |
|                 |                                                          |                          |      | P01447           | roots            | MeOH            | 17.0 $\pm$ 4.5                                               | 2.1 $\pm$ 2.9                                                |
|                 | <i>Nasturtium officinale</i> R. Br.                      | Zw.                      | A    | P01602           | aer. pts.        | PE              | 26.1 $\pm$ 3.8                                               | 5.2 $\pm$ 5.0                                                |
|                 |                                                          |                          |      | P01603           | aer. pts.        | EtOAc           | 7.3 $\pm$ 5.2                                                | 4.6 $\pm$ 3.8                                                |
|                 |                                                          |                          |      | P01601           | aer. pts.        | MeOH            | 30.7 $\pm$ 12.7                                              | 8.5 $\pm$ 2.0                                                |
| Cannabaceae     | <i>Humulus lupulus</i> L.                                | Br., Lo., Ta.2           | A    | P01684           | flowers          | PE              | 31.3 $\pm$ 9.9                                               | 0.0 $\pm$ 0.0                                                |
|                 |                                                          |                          |      | P01685           | flowers          | EtOAc           | 95.8 $\pm$ 2.6                                               | 4.0 $\pm$ 10.5                                               |
|                 |                                                          |                          |      | P01686           | flowers          | MeOH            | 9.2 $\pm$ 5.6                                                | 3.1 $\pm$ 2.2                                                |
| Caryophyllaceae | <i>Gypsophila muralis</i> L.                             | –                        | B    | P01634           | aer. pts.        | PE              | 4.2 $\pm$ 3.5                                                | 0.0 $\pm$ 0.0                                                |
|                 |                                                          |                          |      | P01635           | aer. pts.        | EtOAc           | 10.9 $\pm$ 8.1                                               | 8.5 $\pm$ 12.0                                               |
|                 |                                                          |                          |      | P01636           | aer. pts.        | MeOH            | 4.7 $\pm$ 1.6                                                | 0.0 $\pm$ 0.0                                                |
| Clusiaceae      | <i>Hypericum perforatum</i> L.                           | Bo., Fu., Lo., Ma., Ta.2 | A    | P01693           | aer. pts.        | PE              | 69.3 $\pm$ 17.2                                              | 32.3 $\pm$ 40.0                                              |
|                 |                                                          |                          |      | P01694           | aer. pts.        | EtOAc           | 97.5 $\pm$ 1.2                                               | 20.0 $\pm$ 1.3                                               |
|                 |                                                          |                          |      | P01695           | aer. pts.        | MeOH            | 16.8 $\pm$ 10.8                                              | 1.6 $\pm$ 2.3                                                |
| Cucurbitaceae   | <i>Bryonia alba</i> L.                                   | –                        | A    | P01487           | roots            | PE              | 18.0 $\pm$ 6.8                                               | 0.8 $\pm$ 0.6                                                |
|                 |                                                          |                          |      | P01488           | roots            | EtOAc           | 13.7 $\pm$ 10.1                                              | 0.0 $\pm$ 0.0                                                |
|                 |                                                          |                          |      | P01489           | roots            | MeOH            | 9.2 $\pm$ 5.0                                                | 0.0 $\pm$ 0.0                                                |
| Ericaceae       | <i>Arbutus unedo</i> L.                                  | –                        | A    | P01445           | roots            | PE              | 19.1 $\pm$ 7.8                                               | 0.0 $\pm$ 0.0                                                |
|                 |                                                          |                          |      | P01446           | roots            | EtOAc           | 8.8 $\pm$ 10.4                                               | 0.7 $\pm$ 0.6                                                |
|                 |                                                          |                          |      | P01447           | roots            | MeOH            | 4.4 $\pm$ 6.2                                                | 1.5 $\pm$ 2.1                                                |
| Euphorbiaceae   | <i>Euphorbia cyparissias</i> L.                          | –                        | A    | P01572           | aer. pts.        | PE              | 11.0 $\pm$ 9.3                                               | 0.0 $\pm$ 0.0                                                |
|                 |                                                          |                          |      | P01573           | aer. pts.        | EtOAc           | 18.4 $\pm$ 11.5                                              | 0.0 $\pm$ 0.0                                                |
|                 |                                                          |                          |      | P01571           | aer. pts.        | MeOH            | 10.2 $\pm$ 7.3                                               | 0.0 $\pm$ 0.0                                                |
| Fabaceae        | <i>Anthyllis vulneraria</i> L.                           | –                        | A    | P01439           | flowers          | PE              | 20.7 $\pm$ 5.0                                               | 13.5 $\pm$ 5.1                                               |
|                 |                                                          |                          |      | P01440           | flowers          | EtOAc           | 20.8 $\pm$ 14.7                                              | 8.9 $\pm$ 5.8                                                |
|                 |                                                          |                          |      | P01441           | flowers          | MeOH            | 15.8 $\pm$ 12.5                                              | 7.3 $\pm$ 3.7                                                |
|                 | <i>Robinia pseudoacacia</i> L.                           | –                        | A    | P01466           | flowers          | PE              | 26.7 $\pm$ 5.2                                               | 7.5 $\pm$ 1.8                                                |
|                 |                                                          |                          |      | P01467           | flowers          | EtOAc           | 39.1 $\pm$ 5.6                                               | 8.0 $\pm$ 7.3                                                |
|                 |                                                          |                          |      | P01468           | flowers          | MeOH            | 0.0 $\pm$ 0.0                                                | 0.0 $\pm$ 0.0                                                |
| Gentianaceae    | <i>Centaurium erythraea</i> Rafn.                        | Ma., Ta.1, Ta.2, Zw.     | A    | P01654           | aer. pts.        | PE              | 9.1 $\pm$ 6.5                                                | 5.4 $\pm$ 1.7                                                |
|                 |                                                          |                          |      | P01655           | aer. pts.        | EtOAc           | 38.9 $\pm$ 4.2                                               | 0.0 $\pm$ 0.0                                                |
|                 |                                                          |                          |      | P01656           | aer. pts.        | MeOH            | 3.6 $\pm$ 2.8                                                | 2.3 $\pm$ 3.2                                                |
|                 | <i>Gentiana lutea</i> L.                                 | Bo., Ma., Ta.2, Zw.      | A    | P01642           | roots            | PE              | 4.4 $\pm$ 2.1                                                | 7.9 $\pm$ 10.8                                               |
|                 |                                                          |                          |      | P01643           | roots            | EtOAc           | 9.7 $\pm$ 5.4                                                | 0.0 $\pm$ 0.0                                                |
|                 |                                                          |                          |      | P01644           | roots            | MeOH            | 0.3 $\pm$ 0.4                                                | 0.0 $\pm$ 0.0                                                |
| Lamiaceae       | <i>Galeopsis segetum</i> Neck.                           | –                        | A    | P01578           | aer. pts.        | PE              | 18.1 $\pm$ 10.1                                              | 0.0 $\pm$ 0.0                                                |
|                 |                                                          |                          |      | P01579           | aer. pts.        | EtOAc           | 7.6 $\pm$ 6.9                                                | 1.6 $\pm$ 2.2                                                |
|                 |                                                          |                          |      | P01577           | aer. pts.        | MeOH            | 23.7 $\pm$ 7.6                                               | 2.4 $\pm$ 3.4                                                |

Tab. S1. (Cont).

| Plant Family  | Plant species                             | Historical source        | Src. | Voucher specimen | Plant part | extract solvent | growth inhib. at 4.81 µg/mL ± SD <sup>a</sup> |             | growth inhib. at 0.81 µg/mL ± SD <sup>a</sup> |             |
|---------------|-------------------------------------------|--------------------------|------|------------------|------------|-----------------|-----------------------------------------------|-------------|-----------------------------------------------|-------------|
| Lamiaceae     | <i>Hyssopus officinalis</i> L.            | Ma.                      | A    | P01584           | aer. pts.  | PE              | 66.0 ± 8.3                                    | 0.0 ± 0.0   | 0.0 ± 0.0                                     | 0.0 ± 0.0   |
|               |                                           |                          |      | P01585           | aer. pts.  | EtOAc           | 6.1 ± 4.3                                     | 1.8 ± 2.6   | 1.8 ± 2.6                                     | 1.8 ± 2.6   |
|               |                                           |                          |      | P01582           | aer. pts.  | MeOH            | 64.1 ± 5.9                                    | 6.3 ± 5.3   | 6.3 ± 5.3                                     | 6.3 ± 5.3   |
|               | <i>Nepeta cataria</i> L.                  | Br.                      | A    | P01605           | aer. pts.  | PE              | 35.2 ± 3.7                                    | 0.2 ± 0.3   | 0.2 ± 0.3                                     | 0.2 ± 0.3   |
|               |                                           |                          |      | P01606           | aer. pts.  | EtOAc           | 5.8 ± 4.9                                     | 6.1 ± 8.7   | 6.1 ± 8.7                                     | 6.1 ± 8.7   |
|               |                                           |                          |      | P01604           | aer. pts.  | MeOH            | 12.7 ± 2.4                                    | 0.0 ± 0.0   | 0.0 ± 0.0                                     | 0.0 ± 0.0   |
|               | <i>Origanum dictamnus</i> L.              | —                        | A    | P01542           | aer. pts.  | PE              | 16.4 ± 7.2                                    | 0.0 ± 0.0   | 0.0 ± 0.0                                     | 0.0 ± 0.0   |
|               |                                           |                          |      | P01543           | aer. pts.  | EtOAc           | 33.1 ± 16.3                                   | 16.9 ± 4.8  | 16.9 ± 4.8                                    | 16.9 ± 4.8  |
|               |                                           |                          |      | P01541           | aer. pts.  | MeOH            | 14.7 ± 7.6                                    | 3.9 ± 5.5   | 3.9 ± 5.5                                     | 3.9 ± 5.5   |
|               | <i>Origanum vulgare</i> L.                | —                        | A    | P01608           | aer. pts.  | PE              | 57.7 ± 15.0                                   | 5.3 ± 5.3   | 5.3 ± 5.3                                     | 5.3 ± 5.3   |
|               |                                           |                          |      | P01607           | aer. pts.  | MeOH            | 53.3 ± 15.6                                   | 9.9 ± 9.4   | 9.9 ± 9.4                                     | 9.9 ± 9.4   |
|               | <i>Stachys officinalis</i> (L.) Trev.     | Br.                      | A    | P01478           | aer. pts.  | PE              | 30.5 ± 17.6                                   | 0.0 ± 0.0   | 0.0 ± 0.0                                     | 0.0 ± 0.0   |
|               |                                           |                          |      | P01479           | aer. pts.  | EtOAc           | 30.5 ± 8.8                                    | 2.1 ± 1.5   | 2.1 ± 1.5                                     | 2.1 ± 1.5   |
| Piperaceae    | <i>Piper cubeba</i> L.F.                  | —                        | A    | P01480           | aer. pts.  | MeOH            | 4.2 ± 5.8                                     | 0.0 ± 0.0   | 0.0 ± 0.0                                     | 0.0 ± 0.0   |
| Polygonaceae  | <i>Bistorta officinalis</i> Delarb.       | —                        | A    | P01520           | fruits     | PE              | 34.9 ± 2.4                                    | 18.3 ± 5.1  | 18.3 ± 5.1                                    | 18.3 ± 5.1  |
|               |                                           |                          |      | P01481           | aer. pts.  | PE              | 7.1 ± 6.1                                     | 0.0 ± 0.0   | 0.0 ± 0.0                                     | 0.0 ± 0.0   |
|               |                                           |                          |      | P01482           | aer. pts.  | EtOAc           | 23.3 ± 6.8                                    | 4.2 ± 3.0   | 4.2 ± 3.0                                     | 4.2 ± 3.0   |
|               |                                           |                          |      | P01483           | aer. pts.  | MeOH            | 14.1 ± 5.7                                    | 0.0 ± 0.0   | 0.0 ± 0.0                                     | 0.0 ± 0.0   |
|               |                                           |                          |      | P01484           | roots      | PE              | 11.1 ± 8.2                                    | 2.1 ± 2.3   | 2.1 ± 2.3                                     | 2.1 ± 2.3   |
|               |                                           |                          |      | P01485           | roots      | EtOAc           | 12.6 ± 11.2                                   | 1.5 ± 2.1   | 1.5 ± 2.1                                     | 1.5 ± 2.1   |
| Ranunculaceae | <i>Aquilegia vulgaris</i> L.              | —                        | A    | P01486           | roots      | MeOH            | 6.7 ± 7.5                                     | 0.0 ± 0.0   | 0.0 ± 0.0                                     | 0.0 ± 0.0   |
|               |                                           |                          |      | P01442           | aer. pts.  | PE              | 18.1 ± 3.5                                    | 4.5 ± 4.0   | 4.5 ± 4.0                                     | 4.5 ± 4.0   |
|               |                                           |                          |      | P01443           | aer. pts.  | EtOAc           | 42.7 ± 7.4                                    | 12.0 ± 0.8  | 12.0 ± 0.8                                    | 12.0 ± 0.8  |
|               |                                           |                          |      | P01444           | aer. pts.  | MeOH            | 18.7 ± 2.3                                    | 5.7 ± 3.7   | 5.7 ± 3.7                                     | 5.7 ± 3.7   |
| Rosaceae      | <i>Alchemilla alpina</i> L.               | —                        | A    | P01533           | aer. pts.  | PE              | 67.3 ± 9.2                                    | 11.1 ± 3.2  | 11.1 ± 3.2                                    | 11.1 ± 3.2  |
|               |                                           |                          |      | P01534           | aer. pts.  | EtOAc           | 12.6 ± 3.6                                    | 1.2 ± 1.7   | 1.2 ± 1.7                                     | 1.2 ± 1.7   |
|               |                                           |                          |      | P01532           | aer. pts.  | MeOH            | 27.6 ± 5.4                                    | 10.6 ± 7.5  | 10.6 ± 7.5                                    | 10.6 ± 7.5  |
|               |                                           |                          |      | P01563           | aer. pts.  | PE              | 43.3 ± 2.6                                    | 5.8 ± 0.4   | 5.8 ± 0.4                                     | 5.8 ± 0.4   |
|               | <i>Alchemilla vulgaris</i> L. em. Fröhner | —                        | A    | P01564           | aer. pts.  | EtOAc           | 11.4 ± 0.6                                    | 3.1 ± 0.2   | 3.1 ± 0.2                                     | 3.1 ± 0.2   |
|               |                                           |                          |      | P01562           | aer. pts.  | MeOH            | 11.1 ± 20.4                                   | 0.0 ± 0.0   | 0.0 ± 0.0                                     | 0.0 ± 0.0   |
|               | <i>Agrimonia eupatoria</i> L.             | Br., Lo., Ma., Ta.2, Zw. | A    | P01699           | aer. pts.  | PE              | 47.9 ± 6.1                                    | 0.0 ± 0.0   | 0.0 ± 0.0                                     | 0.0 ± 0.0   |
|               |                                           |                          |      | P01700           | aer. pts.  | EtOAc           | 20.4 ± 4.7                                    | 1.1 ± 1.1   | 1.1 ± 1.1                                     | 1.1 ± 1.1   |
|               | <i>Geum urbanum</i> L.                    | —                        | A    | P01701           | aer. pts.  | MeOH            | 53.6 ± 17.6                                   | 21.8 ± 20.6 | 21.8 ± 20.6                                   | 21.8 ± 20.6 |
|               |                                           |                          |      | P01505           | roots      | PE              | 8.6 ± 1.9                                     | 0.0 ± 0.0   | 0.0 ± 0.0                                     | 0.0 ± 0.0   |
|               |                                           |                          |      | P01506           | roots      | EtOAc           | 14.7 ± 11.5                                   | 1.2 ± 1.7   | 1.2 ± 1.7                                     | 1.2 ± 1.7   |
|               |                                           |                          |      | P01506           | roots      | MeOH            | 3.4 ± 3.1                                     | 0.0 ± 0.0   | 0.0 ± 0.0                                     | 0.0 ± 0.0   |
|               |                                           |                          |      | P01507           | aer. pts.  | PE              | 11.0 ± 8.3                                    | 0.3 ± 0.4   | 0.3 ± 0.4                                     | 0.3 ± 0.4   |
|               |                                           |                          |      | P01508           | aer. pts.  | EtOAc           | 25.0 ± 6.9                                    | 0.0 ± 0.0   | 0.0 ± 0.0                                     | 0.0 ± 0.0   |
|               |                                           |                          |      | P01509           | aer. pts.  | MeOH            | 17.6 ± 8.1                                    | 3.6 ± 4.6   | 3.6 ± 4.6                                     | 3.6 ± 4.6   |
|               |                                           |                          |      | P01696           | roots      | PE              | 7.6 ± 5.5                                     | 0.0 ± 0.0   | 0.0 ± 0.0                                     | 0.0 ± 0.0   |
|               | <i>Potentilla erecta</i> (L.) Raeusch.    | Br., Bo., Lo., Ta.2      | A    | P01697           | roots      | EtOAc           | 23.8 ± 1.8                                    | 9.5 ± 3.8   | 9.5 ± 3.8                                     | 9.5 ± 3.8   |
|               |                                           |                          |      | P01698           | roots      | MeOH            | 7.3 ± 1.9                                     | 1.8 ± 2.5   | 1.8 ± 2.5                                     | 1.8 ± 2.5   |
|               |                                           |                          |      | P01436           | aer. pts.  | PE              | 16.9 ± 12.3                                   | 7.7 ± 7.6   | 7.7 ± 7.6                                     | 7.7 ± 7.6   |
|               | <i>Potentilla anserina</i> L.             | —                        | A    | P01437           | aer. pts.  | EtOAc           | 16.7 ± 15.9                                   | 18.9 ± 4.7  | 18.9 ± 4.7                                    | 18.9 ± 4.7  |
|               |                                           |                          |      | P01438           | aer. pts.  | MeOH            | 24.4 ± 6.1                                    | 19.5 ± 8.9  | 19.5 ± 8.9                                    | 19.5 ± 8.9  |
|               |                                           |                          |      | P01687           | leaves     | PE              | 11.1 ± 5.3                                    | 4.4 ± 4.9   | 4.4 ± 4.9                                     | 4.4 ± 4.9   |
|               | <i>Potentilla aurea</i> L.                | Zw.                      | A    | P01688           | leaves     | EtOAc           | 18.5 ± 1.6                                    | 6.1 ± 4.6   | 6.1 ± 4.6                                     | 6.1 ± 4.6   |
|               |                                           |                          |      | P01689           | leaves     | MeOH            | 13.0 ± 6.3                                    | 5.3 ± 4.0   | 5.3 ± 4.0                                     | 5.3 ± 4.0   |
|               |                                           |                          |      | P01469           | aer. pts.  | PE              | 8.5 ± 9.7                                     | 0.0 ± 0.0   | 0.0 ± 0.0                                     | 0.0 ± 0.0   |
| Rubiaceae     | <i>Galium odoratum</i> (L.) Scop.         | —                        | A    | P01470           | aer. pts.  | EtOAc           | 21.8 ± 4.5                                    | 0.0 ± 0.0   | 0.0 ± 0.0                                     | 0.0 ± 0.0   |
|               |                                           |                          |      | P01471           | aer. pts.  | MeOH            | 20.4 ± 4.6                                    | 9.2 ± 13.1  | 9.2 ± 13.1                                    | 9.2 ± 13.1  |
| Verbenaceae   | <i>Verbena officinalis</i> L.             | Bo., Ta.2, Zw.           | B    | P01690           | aer. pts.  | PE              | 8.8 ± 8.7                                     | 0.0 ± 0.0   | 0.0 ± 0.0                                     | 0.0 ± 0.0   |
|               |                                           |                          |      | P01691           | aer. pts.  | EtOAc           | 40.9 ± 16.8                                   | 3.7 ± 3.5   | 3.7 ± 3.5                                     | 3.7 ± 3.5   |
|               |                                           |                          |      | P01692           | aer. pts.  | MeOH            | 22.5 ± 19.0                                   | 1.5 ± 2.2   | 1.5 ± 2.2                                     | 1.5 ± 2.2   |

Source A: Plants were obtained from Dixa (St. Gallen, Switzerland).

Source B: Plants were collected in and around Basel by Dr. M. Adams in the summer of 2010.

## Analytical methods

### TLC

Thin layer chromatography plates (TLC silica gel 60 F254) were from Merck (Darmstadt, Germany). Mobile phase: ethyl acetate/*n*-heptane 30:70. Detection was done in a UV

chamber at 254 and 366 nm. Spots were also visualised with anisaldehyde-sulphuric acid reagent, which was prepared according to Wagner and Bladt [21].

### **HPLC ESI-MS**

For micro fractionation and analysis of extracts an HPLC system consisting of a 1100 series low-pressure mixing pump with degasser module, column oven, and a 1100 series PDA detector (all Agilent, Waldbronn, Germany) was used. A Gilson 215 liquid handler with Gilson 819 injection module and 50 µl loop served as autosampler (Gilson; Mettmenstetten, Switzerland). The HPLC was coupled to an Esquire 3000 Plus ion trap mass spectrometer equipped with an electrospray (ESI) interface (Bruker Daltonics; Bremen, Germany). The MS parameters were as follows: Spectra were recorded under ion charge control conditions (ICCD 30 000) at a scan speed of 30 000 m/z/s with a Gauss filter with of 0.2 m/z. Nitrogen was used as a drying gas a flow rate of 10 L/min and as nebulising gas at a pressure of 30 psi. The nebulizer temperature was set 300 ° C. In the positive ion mode spectra were detected from 150–1500 m/z. Capillary voltage was set at -4500 V, endplate offset at -500 V. capillary exit at 109.8 V, skimmer voltage at 65.0 V, and trap drive at 39.8. The negative ion mode was also recorded from 150–1500 m/z. Capillary voltage was set at 4500 V, endplate offset at -500 V. capillary exit at -111.8 V, skimmer voltage at -40 V, and trap drive at 43.7. A SunFire RP-18, 3.5 µm, 3 x 150 mm (Waters GmbH, Eschborn, Germany) was used for HPLC ESI-MS. A gradient consisting of A (H<sub>2</sub>O + 0.1% formic acid) and B (acetonitrile + 0.1% formic acid) was used, starting at 90% A–10 % B and leading to 0% A–100% B in 30 min, followed 100% B for 5 minutes. The flow rate was 0.5mL/min. Data acquisition and processing for HPLC system was performed using HyStar 3.0. software (Bruker Daltonics).

### **MPLC**

A Büchi Sepacore system consisting of a control unit C-620, a fraction collector C-660, an UV photometer C-635, and two pump modules C-605 was used, with the following method. The column consisted of a cartridge (Büchi, ø 40 x150 mm) containing pressed silica gel (Silica gel 60, 0.040-0.063 mm, Merck, Darmstadt, Germany). A gradient system was used consisting of A (heptane) and B (ethyl acetate), starting at 100 % A and 0% B, and leading to 70% A and 30% B in 33 minutes, then to 20 % A and 80 % B in 31.5 minutes. The flow rate was 30 mL/min. Fractions were collected every 30 seconds. The sample was dissolved in A:B 1:1 at a concentration of 50 mg/mL and the injection volume was 10 ml.

### **Semi-preparative HPLC**

Semi-preparative HPLC was done on an Agilent 1100 series HPLC system consisting of an 1100 series quaternary low-pressure mixing pump with degasser module, column oven, and a 1100 series PDA detector with a 1000 µL loop.) using a SunFire prep RP-18 column (5 µm, 10 x 150 mm, Waters GmbH, Eschborn, Germany). A gradient starting at 85% A (H<sub>2</sub>O + 0.1% formic acid) and 15% B (acetonitrile + 0.1% formic acid) and leading to 40% A and 60% B in 15 minutes, then to 100 % B in another 5 minutes. Finally the column was flushed with 100% B for 7 minutes. The flow rate was 5 mL/min. The sample was dissolved in MeOH at a concentration of 50 mg/mL and the injection volume was 300 µl.

### **Preparative HPLC**

Preparative HPLC was done on a SCL-10, HPLC system from Shimadzu (Kyoto, Japan). A SunFire™ prep C18 OBD™ (5 µm, 30x 150 mm, Waters, Ireland) was used. The gradient was isocratic for 30 min and consisted of acetonitrile:H<sub>2</sub>O 1: 1 at a flow rate of 30 ml/min. UV data were recorded from 220 to 500 nm. The samples were dissolved in acetonitrile at a concentration of 100 mg/ml and the injection volume was 300 µl.

### **High resolution Mass Spectrometry (micrOTOF)**

High-resolution mass spectra were obtained on a micrOTOF ESI-MS system (Bruker Daltonics) connected to an Agilent 1100 series HPLC. Data acquisition and processing was performed using HyStar 3.0 software (Bruker Daltonics). Conditions for LC-TOF MS were as follows: spectra were recorded in the range of m/z 150–1500 in positive mode. Nitrogen was used as a nebulising gas at a pressure of 2.0 bar and as a drying gas at a flow rate of 9.0 L/min (dry gas temperature 240 °C). Capillary voltage was at 4500 V, endplate offset at -500 V, hexapole at 250.0 Vpp, skimmer 1 at -50 V and skimmer 2 at -22.5 V. Instrument calibration was performed using a reference solution of sodium formate 0.1 % in isopropanol / water (1:1) containing 5 mM sodium hydroxide. Typical mass accuracy was ±2 ppm. The spectra were recorded in negative and positive mode in the range of m/z 150–1500.

### **NMR**

NMR data were acquired at target temperature 18°C on a Bruker Avance III™ 500 MHz spectrometer (Bruker, Fällanden, Switzerland) operating at 500.13 MHz for <sup>1</sup>H, and 125.77 MHz for <sup>13</sup>C. A 1mm TXI microprobe with a z-gradient was used for <sup>1</sup>H-detected experiments; <sup>13</sup>C-NMR spectra were recorded with a 5 mm BBO probe head with z-gradient. NMR experiments were done as previously described [22]. For processing and evaluation Topspin 2.0 was used.

### **Bioassays**

#### *a. In vitro test against Trypanosoma brucei rhodesiense*

*Trypanosoma brucei rhodesiense* (STIB 900) were grown in axenic medium as previously described [23]. The compounds were tested using a modified Alamar Blue assay protocol [24] to determine the 50% inhibitory concentration (IC<sub>50</sub>). Serial threefold drug dilutions were prepared in 96-well micro titer plates and 50 µl of *T. b. rhodesiense* STIB 900 bloodstream forms were added to each well except for the negative controls. Melarsoprol (Arsobal®, Sanofi-Aventis, Meyrin, Switzerland) was used as a reference drug. After 70 h of incubation Alamar blue marker (12.5 mg resazurin dissolved in 100 mL distilled water) was added. The plates were then incubated for an additional 2 to 5 h. A Spectramax Gemini XS micro plate fluorescence reader (Molecular Devices Cooperation, Sunnyvale, CA) with an excitation wavelength of 536 nm and an emission wavelength of 588 nm was used to read the plates. The IC<sub>50</sub> values were calculated from the sigmoidal growth inhibition curves using Softmax Pro software (Molecular Devices).

#### *b. In vitro testing against Plasmodium falciparum*

A modification of the [<sup>3</sup>H]-hypoxanthine incorporation assay was used to determine the intra-erythrocytic antiplasmodial activity (Des Jardins 1979) of the extract library and

purified compounds in 96 well plates. Chloroquine (Sigma-Aldrich) and artesunate (Mepha, Switzerland) were used as standard drugs. Briefly, infected human red blood cells in RPMI 1640 medium (100  $\mu$ L per well with 2.5% haematocrit and 0.3% parasitaemia) were exposed to twofold serial drug dilutions in 96-well micro titer plates. After 48 h incubation, 0.5  $\mu$ Ci [ $^3$ H]-hypoxanthine was added to each well. The plates were incubated for further 24 h before being harvested using a Betaplate cell harvester (Wallac, Zürich, Switzerland). The radioactivity was counted with a Betaplate liquid scintillation counter (Wallac) as counts per minute per well at each drug concentration and compared to the untreated controls. IC<sub>50</sub> values were calculated from sigmoidal inhibition curves using Microsoft Excel. All assays were run in duplicate and repeated three times [25].

### c. *In vitro* cytotoxicity testing

Cytotoxicity was assessed using a similar Alamar Blue assay protocol [23] whereby 4000 rat myoblast cells/well were seeded in RPMI 1640 medium. All following steps were according to the *T. b. rhodesiense* protocol. Podophyllotoxin (Sigma-Aldrich) was used as the reference drug.

## References

- [21] Wagner H, Bladt S, editors.  
Plant Drug Analysis. A thin layer Chromatography Atlas, 2<sup>th</sup> ed.  
Berlin: Springer-Verlag, 1996: 359.
- [22] Adams M, Plitzko I, Kaiser M, Brun R, Hamburger M.  
HPLC-profiling for antiplasmodial compounds – 3-methoxy carpachromene from *Pistacia atlantica*.  
Phytochem Lett. 2009; 2: 159–162.  
<http://dx.doi.org/10.1016/j.phytol.2009.05.006>
- [23] Baltz T, Baltz D, Giroud C, Crockett J.  
Cultivation in a semidefined medium of animal infective forms of *Trypanosoma brucei*, *T. equiperdum*, *T. evansi*, *T. rhodesiense*, *T. gambiense*.  
EMBO J. 1985; 4: 1273–1277.  
<http://www.ncbi.nlm.nih.gov/pubmed/4006919>
- [24] Räs B, Hen M, Grether-Bühler Y, Kaminsky R, Brun R.  
The Alamar Blue assay to determine drug sensitivity of African trypanosomes in vitro.  
Acta Trop. 1997; 68: 139–147.  
[http://dx.doi.org/10.1016/S0001-706X\(97\)00079-X](http://dx.doi.org/10.1016/S0001-706X(97)00079-X)
- [25] Desjardins RE, Canfield CJ, Haynes JD, Chulay JD.  
Quantitative assessment of antimalarial activity *in vitro* by a semiautomated microdilution technique.  
Antimicrob Agents Chemother. 1979; 16: 710–718.  
<http://dx.doi.org/10.1128/AAC.16.6.710>
